# Supplementary material
Source: Springer Nature journal article supplement (https://www.springermedizin.de/resource/supplementary/12935_2007_184_MOESM1_ESM.pdf/9541300)

**A**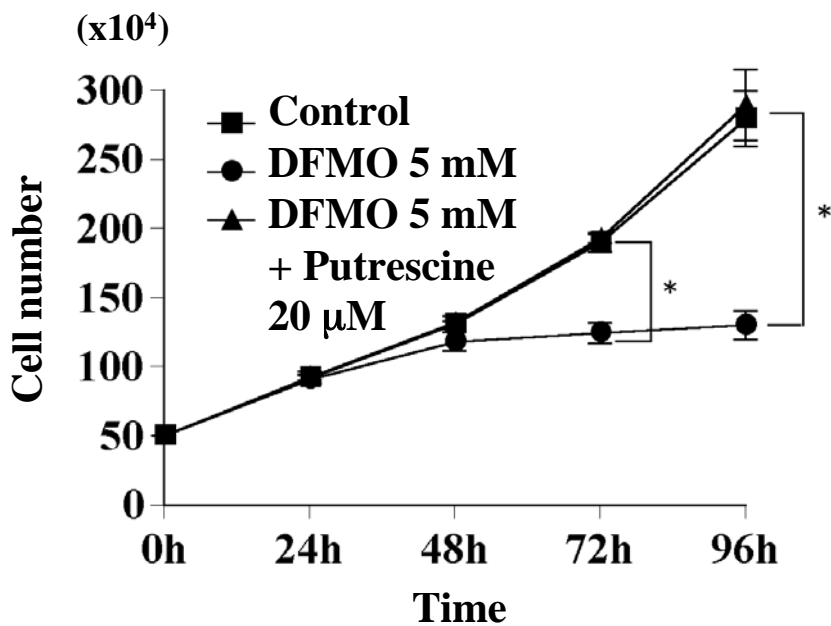**B**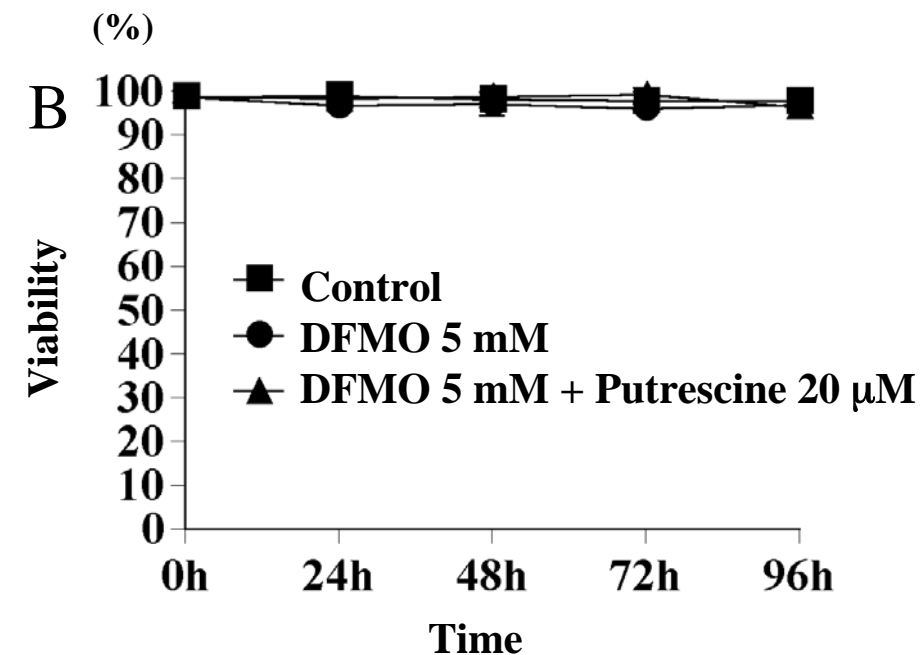

Supplement: MOESM1 [file 9541300]
